# Supplementary material
Source: Springer Nature journal article supplement (https://www.springermedizin.de/resource/supplementary/12986_2009_219_MOESM1_ESM.pdf/25655750)

Inactive

Active

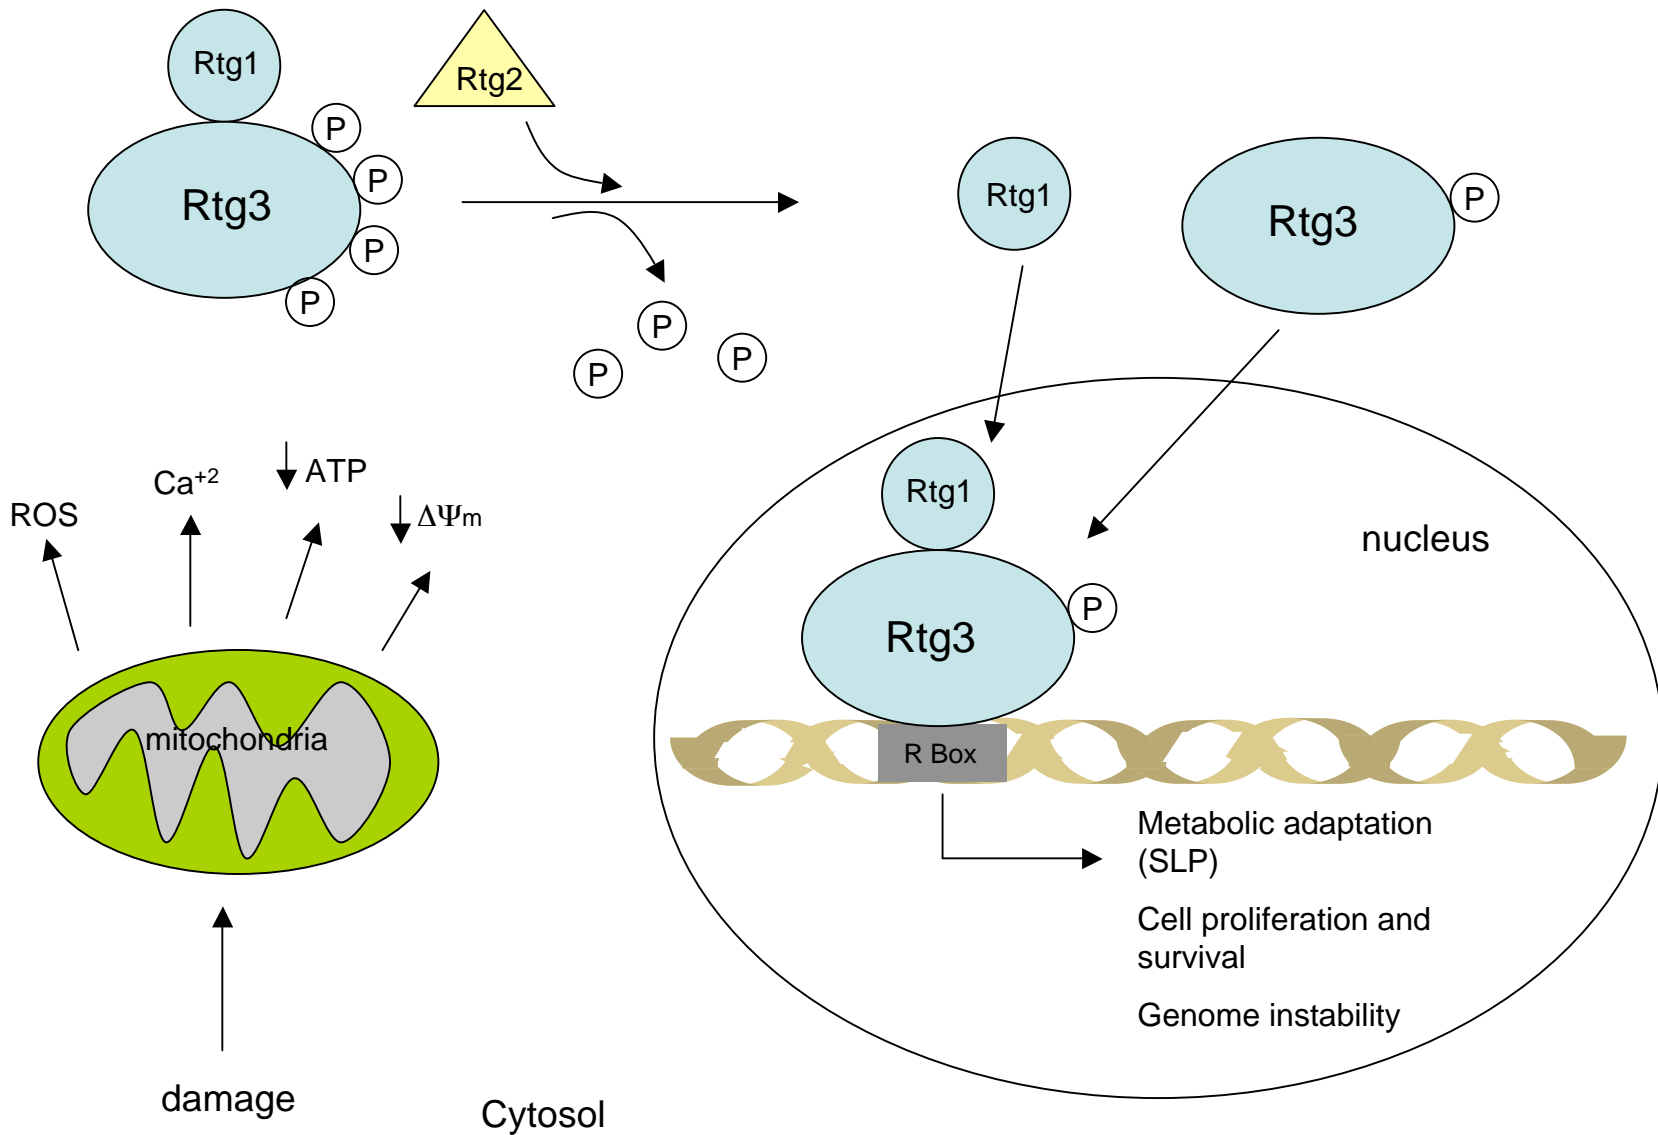

Supplement: MOESM1 [file 25655750]
